# Supplementary material
Source: publisher site journal article supplement (https://www.spandidos-publications.com/8033/downloadSupplementary)
Supplement: Supplementary file 1 [file downloadSupplementary]

## Sheet: string_interactions_short (1)
Table SI. Resulting interaction network scores.
#node1	node2	node1_string_id	node2_string_id	neighborhood_on_chromosome	gene_fusion	phylogenetic_cooccurrence	homology	coexpression	experimentally_determined_interaction	database_annotated	automated_textmining	combined_score
AFG3L2	MRPS7	9606.ENSP00000269143	9606.ENSP00000245539	0	0	0	0	0.176	0.479	0	0.152	0.604
AFG3L2	YME1L1	9606.ENSP00000269143	9606.ENSP00000318480	0	0	0.14	0.783	0.067	0.235	0	0.315	0.523
AFG3L2	ATP5F1A	9606.ENSP00000269143	9606.ENSP00000381736	0	0	0	0	0.191	0.324	0	0.398	0.642
AFG3L2	STOML2	9606.ENSP00000269143	9606.ENSP00000348886	0	0	0	0	0.315	0.319	0	0.366	0.678
AFG3L2	PARL	9606.ENSP00000269143	9606.ENSP00000325421	0	0	0	0	0.105	0.046	0	0.684	0.707
AFG3L2	PHB2	9606.ENSP00000269143	9606.ENSP00000441875	0	0	0	0	0.242	0.454	0.5	0.541	0.892
AFG3L2	PHB	9606.ENSP00000269143	9606.ENSP00000479488	0	0	0	0	0.248	0.672	0.5	0.532	0.945
ATP5F1A	MRPS7	9606.ENSP00000381736	9606.ENSP00000245539	0.042	0	0	0	0.702	0.094	0	0.326	0.802
ATP5F1A	YME1L1	9606.ENSP00000381736	9606.ENSP00000318480	0	0	0	0	0.131	0.507	0	0.343	0.694
ATP5F1A	STOML2	9606.ENSP00000381736	9606.ENSP00000348886	0	0	0	0	0.223	0.52	0	0.253	0.698
ATP5F1A	VDAC2	9606.ENSP00000381736	9606.ENSP00000361635	0	0	0	0	0.381	0.233	0	0.448	0.715
ATP5F1A	PHB2	9606.ENSP00000381736	9606.ENSP00000441875	0	0	0	0	0.236	0.183	0	0.329	0.545
ATP5F1A	PHB	9606.ENSP00000381736	9606.ENSP00000479488	0	0	0	0	0.15	0.386	0	0.368	0.642
CACTIN	STOML2	9606.ENSP00000415078	9606.ENSP00000348886	0	0.705	0	0	0.074	0	0	0.133	0.743
MRPL37	MRPS7	9606.ENSP00000473980	9606.ENSP00000245539	0	0	0	0	0.416	0.817	0	0.419	0.932
MRPL37	STOML2	9606.ENSP00000473980	9606.ENSP00000348886	0	0	0	0	0.664	0.219	0	0	0.727
MRPS7	YME1L1	9606.ENSP00000245539	9606.ENSP00000318480	0	0	0.204	0	0.146	0.404	0	0.077	0.576
MRPS7	PHB	9606.ENSP00000245539	9606.ENSP00000479488	0	0	0	0	0.524	0.292	0	0.192	0.704
MRPS7	STOML2	9606.ENSP00000245539	9606.ENSP00000348886	0	0	0	0	0.672	0	0	0.227	0.735
PARL	YME1L1	9606.ENSP00000325421	9606.ENSP00000318480	0	0	0	0	0.087	0	0.5	0.902	0.951
PARL	PHB	9606.ENSP00000325421	9606.ENSP00000479488	0	0	0	0	0.083	0.292	0	0.444	0.608
PARL	STOML2	9606.ENSP00000325421	9606.ENSP00000348886	0	0	0	0	0.196	0	0.8	0.216	0.863
PARL	PHB2	9606.ENSP00000325421	9606.ENSP00000441875	0	0	0	0	0.092	0.292	0	0.818	0.873
PHB	YME1L1	9606.ENSP00000479488	9606.ENSP00000318480	0	0	0	0	0.196	0.319	0	0.688	0.814
PHB	STOML2	9606.ENSP00000479488	9606.ENSP00000348886	0	0	0	0	0.453	0.63	0	0.749	0.945
PHB	VDAC2	9606.ENSP00000479488	9606.ENSP00000361635	0	0	0	0	0.192	0.663	0	0.697	0.91
PHB	PHB2	9606.ENSP00000479488	9606.ENSP00000441875	0	0	0.068	0.938	0.923	0.973	0.9	0.988	0.999
PHB2	YME1L1	9606.ENSP00000441875	9606.ENSP00000318480	0	0	0	0	0.202	0.524	0	0.615	0.841
PHB2	STOML2	9606.ENSP00000441875	9606.ENSP00000348886	0	0	0	0	0.574	0.227	0	0.627	0.866
PHB2	VDAC2	9606.ENSP00000441875	9606.ENSP00000361635	0	0	0	0	0.243	0.296	0	0.663	0.805
STOML2	YME1L1	9606.ENSP00000348886	9606.ENSP00000318480	0	0	0	0	0.202	0.319	0.5	0.535	0.857
STOML2	VDAC2	9606.ENSP00000348886	9606.ENSP00000361635	0	0	0	0	0.231	0.121	0	0.527	0.652
